# Supplementary material
Source: PubMed Central journal article supplement (PMC2715472)
Supplement: 0903586106_0903586106SI.pdf [file 0903586106_0903586106SI.pdf]

# Supporting Information

Brecht et al. 10.1073/pnas.0903586106

## SI Text

Data analysis of 1D and 2D correlation spectra is given below. The 1D correlation coefficient between 2 time-dependent intensities at 2 wavelengths  $\lambda_1$  and  $\lambda_2$ ,  $y(\lambda_1, t_i)$  and  $y(\lambda_2, t_i)$  is given by

$$r(\lambda_1, \lambda_2) = \frac{\frac{1}{n} \sum_{i=1}^n (y(\lambda_1, t_i) - \bar{y}(\lambda_1)) \cdot (y(\lambda_2, t_i) - \bar{y}(\lambda_2))}{\sqrt{\frac{1}{n} \sum_{i=1}^n (y(\lambda_1, t_i) - \bar{y}(\lambda_1))^2} \cdot \sqrt{\frac{1}{n} \sum_{i=1}^n (y(\lambda_2, t_i) - \bar{y}(\lambda_2))^2}} \quad [\text{s1}]$$

with the average spectra  $\bar{y}(\lambda_j) = (1/n) \sum_{i=1}^n y(\lambda_j, t_i)$ .

The 2-dimensional synchronous correlation spectrum (2D-SCS) of a 2-dimensional data array  $y(\lambda_j, t_i)$ , e.g., of wavelength  $\lambda$  and time  $t$ , is given by the expression (1):

$$\Phi(\lambda_1, \lambda_2) = \frac{1}{m-1} \sum_{i=1}^m \hat{y}(\lambda_1, t_i) \cdot \hat{y}(\lambda_2, t_i), \quad [\text{s2}]$$

where  $\hat{y}(\lambda_j, t_i) = y(\lambda_j, t_i) - \bar{y}(\lambda_j)$  describes the dynamical part of the spectrum. For sets of spectra taken as a function of time, the 2D-SCS represents correlated changes of intensities measured at wavelengths  $\lambda_1$  and  $\lambda_2$  during data collection. The 2D-SCS is a symmetric spectrum with respect to the diagonal  $\lambda_1 = \lambda_2$ . Peaks appearing on the diagonal and off-diagonal positions are referred to as autopeaks and cross-peaks, respectively. Autopeaks of a symmetric spectral band possess a circular shape in the

2D-SCS representation. Bands that undergo large intensity variations during the time of data collection show strong auto-peaks, whereas bands that undergo no intensity variations show vanishing autopeaks. Cross-peaks represent a correlated change of intensity at 2 different spectral positions  $\lambda_1$  and  $\lambda_2$ . The sign of the cross-peak specifies whether the changes are correlated (positive sign) or anticorrelated (negative sign). Example series of simulated spectra and their corresponding 2D-SCS are shown in Fig. S1. In the top row of Fig. S1, 3 types of time-dependent spectra are given; each of them has 3 contributions at the wavelengths  $\lambda_1$ ,  $\lambda_2$ , and  $\lambda_3$ . In Fig. S1A, these 3 contributions undergo either a linear decrease ( $\lambda_1, \lambda_3$ ) or a linear increase ( $\lambda_2$ ). In Fig. S1B, the time order of the spectra shown in A was changed randomly; and in Fig. S1C, noise was added to the spectra shown in B. The middle row of Fig. S1 shows the contour representation of the spectra, and in the third row the corresponding 2D-SCS are given. The autopeaks are labeled in the left 2D-SCS as a1, a2, and a3 and the 3 cross-peaks as c12, c23, and c13.

The cross-peaks c13 connect the intensity at position a1 with the intensity at a3. The positive sign of the cross-peak indicates the correlated intensity change. Negative signs for the cross-peaks are found in the case of c23 and c12 formed between a1 and a2 and between a2 and a3, as their intensity changes are anticorrelated. The 2D-SCS spectra shown in Fig. S1 B and C show the same features as in A, irrespective of the random time order of the spectra and the added noise. With the 2D-SCS, it is therefore possible to unravel correlated behavior in single-molecule spectra that might be hidden in the time-dependent spectra due to random variations and limited signal-noise ratio.

1. Noda I, Dowrey AE, Marcott C, Story GM, Ozaki Y (2000) Generalized two-dimensional correlation spectroscopy. *Appl Spectrosc* 54:236A–248A.
